# Supplementary material for: Insights into the Mechanism Underlying the Influence of Glycation with Different Saccharides and Temperatures on the IgG/IgE Binding Ability, Immunodetection, In Vitro Digestibility of Shrimp (Litopenaeus vannamei) Tropomyosin
Source: MDPI journal article supplement (doi:10.3390/foods12163049), 2023-08-14
Supplement: s1 [file s1]

**Table S1.** Serological characterization of shrimp-allergic patients.

| Serum No. | Shrimp sIgE (kU/L) |
|-----------|--------------------|
| P1        | 20.7               |
| P2        | 18.1               |
| P3        | 16.2               |
| P4        | 15.1               |
| P5        | 27.4               |
| P6        | 32.2               |
| N1        | ≤0.35              |
| N2        | ≤0.35              |
